# Supplementary material for: Determination of p-aminohippuric acid with β-cyclodextrin sensitized fluorescence spectrometry
Source: Royal Society of Chemistry journal article supplement (doi:10.1039/c6ra11742b), 2016-01-01
Supplement: c6ra11742b1.pdf [file c6ra11742b1.pdf]

## Supplementary material

### Determination of p-amino hippuric acid with $\beta$ -Cyclodextrin sensitized fluorescence spectrometry.

Rashed H. Alrumathi; Mohammed A. Meetani\*; Mu'ath Mousa; Na'il Saleh; John Graham

Chemistry Department, College of Science, United Arab Emirates University, P. O. Box 15551, Al-Ain, UAE.

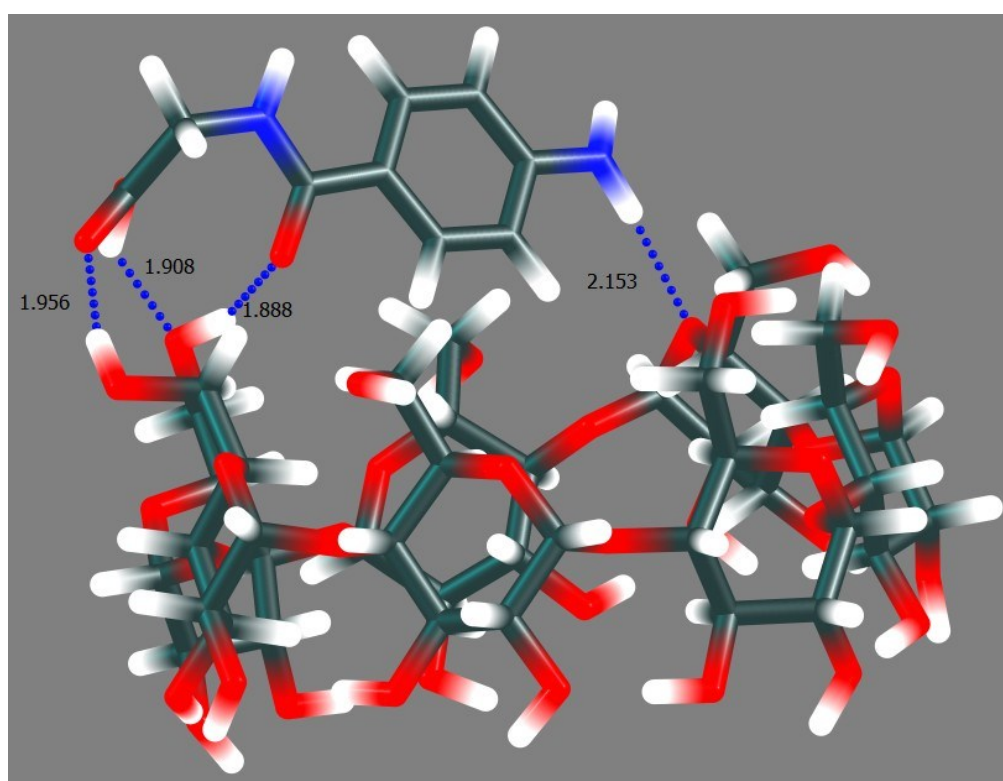

Figure 1S: Optimized gas-phase structure for interaction of PAH and  $\beta$ -CD with PAH outside  $\beta$ -CD cavity.

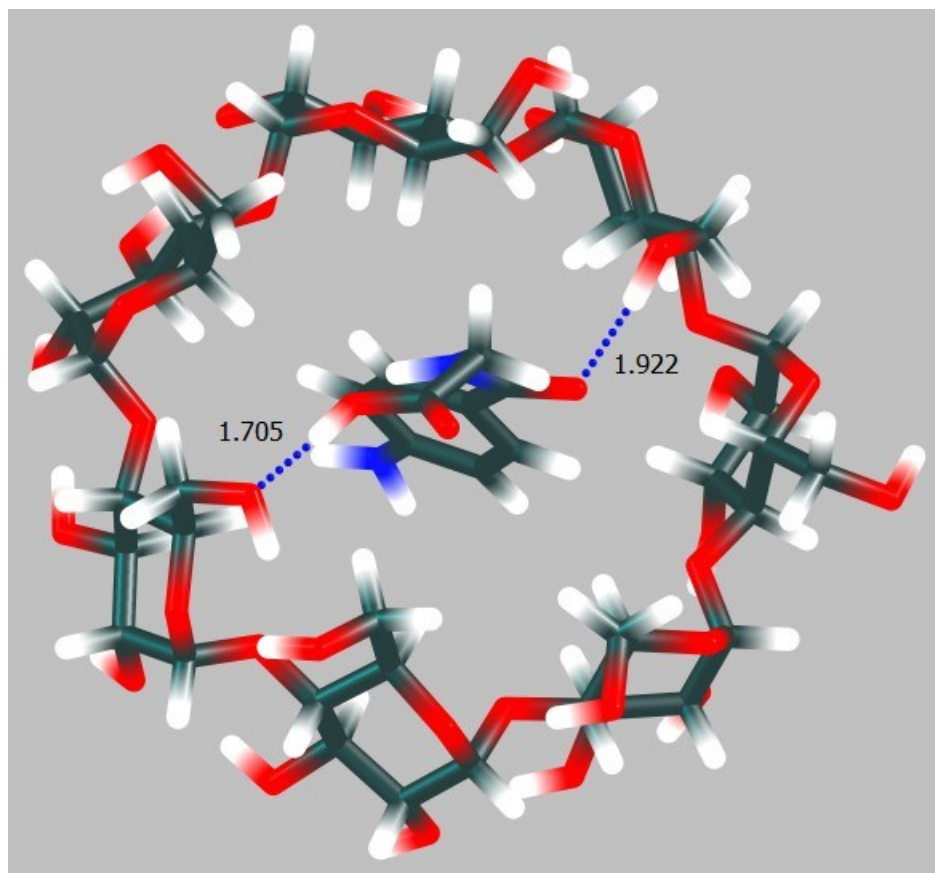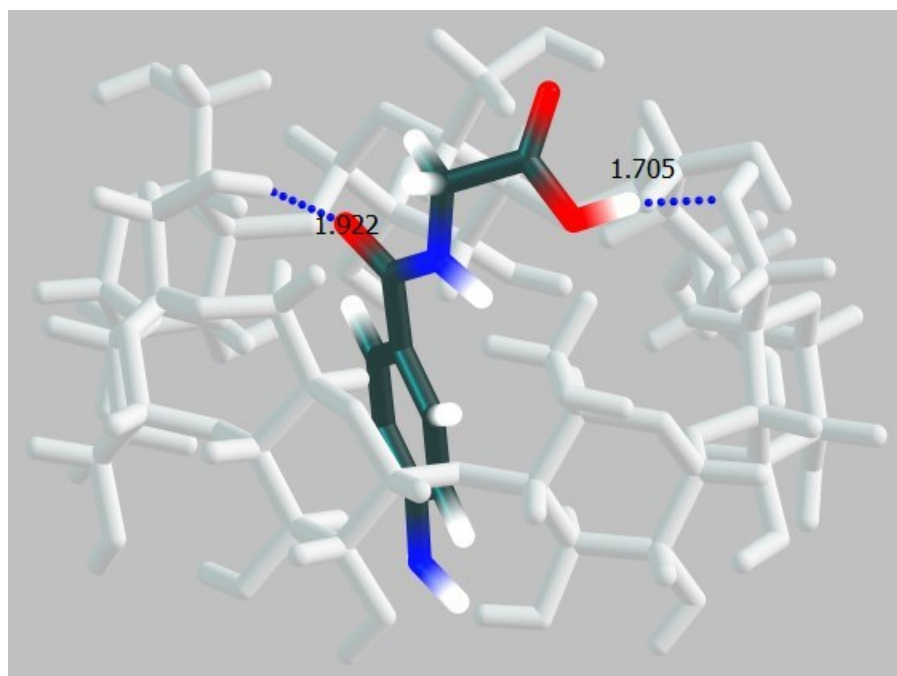

Figure 2S: Optimized gas-phase structure for interaction of PAH and  $\beta$ -CD with PAH inside  $\beta$ -CD cavity.

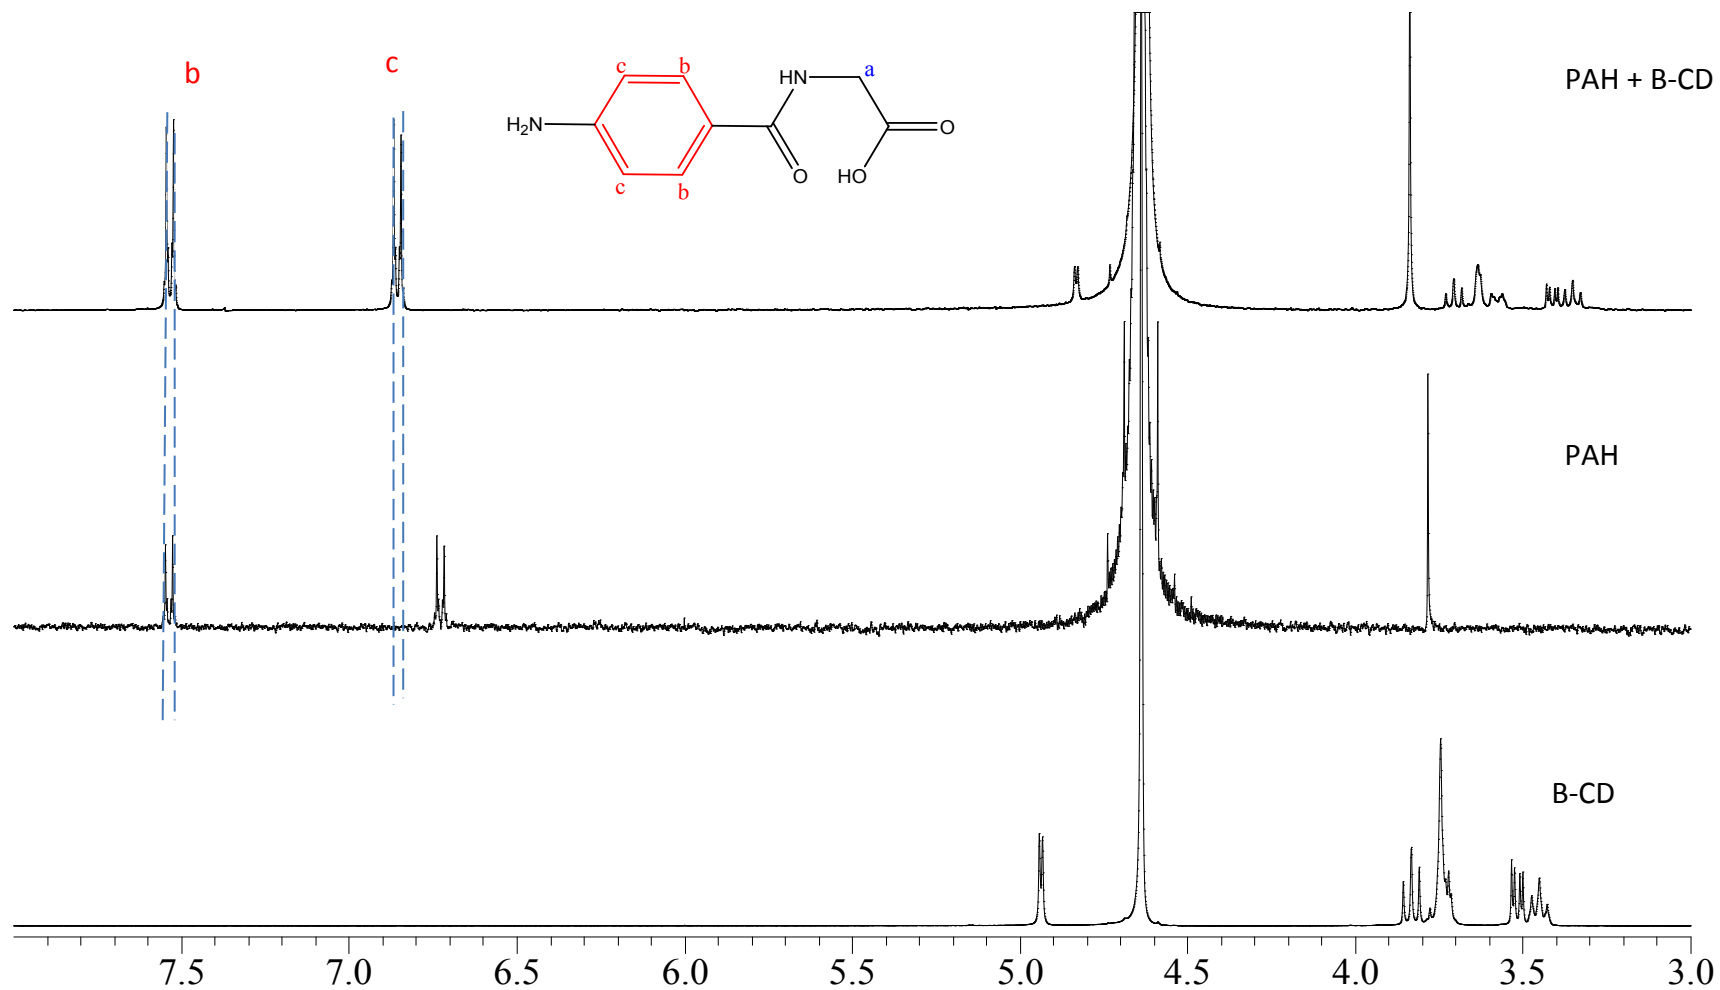

Figure 3S. NMR spectra of  $\beta$ -CD (10 mM), PAH (0.5 mM) and mixture of (0.5 mM PAH and 10mM  $\beta$ -CD), all solutions were prepared in D<sub>2</sub>O Solvent.
